# Supplementary material for: SGIV Induced and Exploited Cellular De Novo Fatty Acid Synthesis for Virus Entry and Replication
Source: MDPI journal article supplement (doi:10.3390/v14020180), 2022-01-18

## Supplementary material

**Figure S1.** The mRNA expression of MCP and VP19 in different tissues of grouper during SGIV infection.  $n = 3$ , data are expressed as means  $\pm$  SD. \* indicates  $p < 0.05$ .

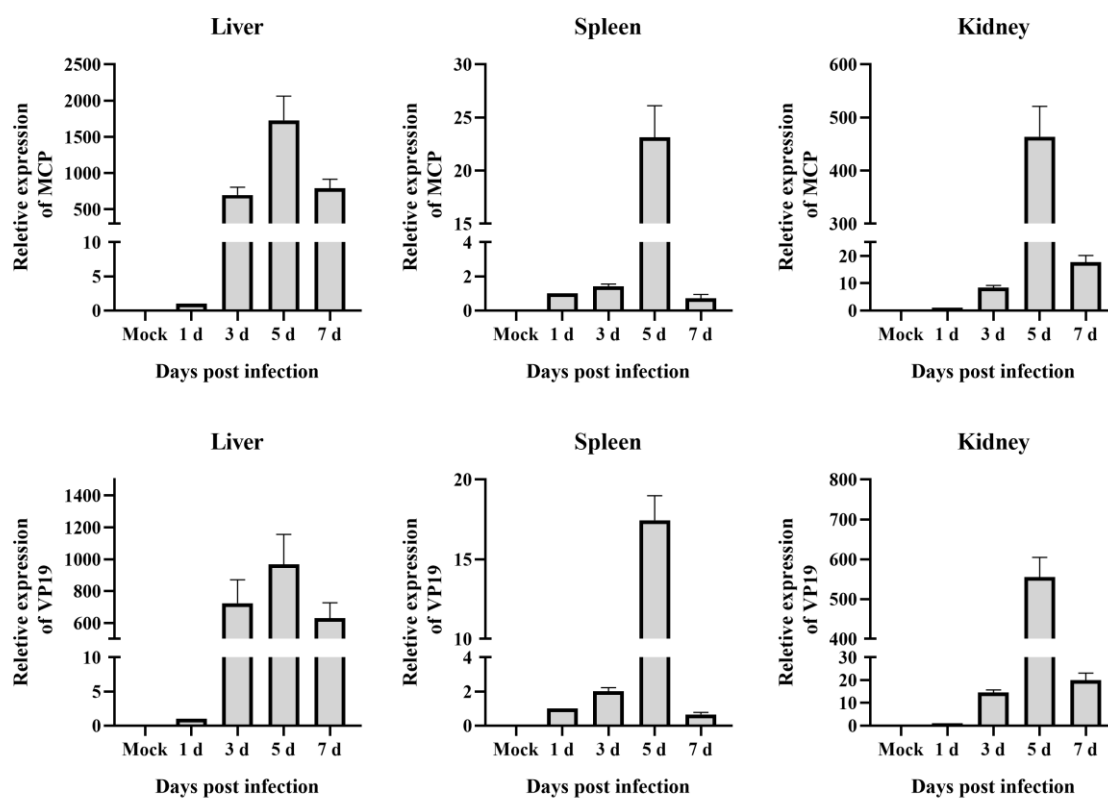

Supplement: s1 [file s1]
